## Infective endocarditis after transcatheter aortic valve implantation

C. Arellano Serrano<sup>1</sup>, J.F. Oteo Dominguez<sup>1</sup>, A. Garcia Touchard<sup>1</sup>, J.A. Fernandez Diaz<sup>1</sup>, M. Del Trigo Espinosa<sup>1</sup>, J. Calderon Parra<sup>2</sup>, A. Ramos Martinez<sup>2</sup>, M. Cobo Marcos<sup>1</sup>, F. Dominguez Rodriguez<sup>1</sup>, V. Monivas Palomero<sup>1</sup>, S. Mingo Santos<sup>1</sup>, J. Goicolea Ruigomez<sup>1</sup>, J. Segovia Cubero<sup>1</sup>

<sup>1</sup> University Hospital Puerta de Hierro Majadahonda, Cardiology, Madrid, Spain; <sup>2</sup> University Hospital Puerta de Hierro Majadahonda, Internal Medicine, Madrid, Spain

**Funding Acknowledgement:** Type of funding sources: None.

**Introduction:** Infective endocarditis (IE) is a potentially serious complication in patients with prosthetic heart valves. The objective of this study is to analyze and describe the incidence, baseline characteristics, risks factors and in-hospital evolution in IE after Transcatheter Aortic Valve Implantation (IE-TAVI).

**Methods:** All the TAVI implanted in our center since the beginning of the program have been included consecutively. Patients with a confirmed diagnosis of IE according to the "ESC Guidelines for the management of infective endocarditis" are identified and analyzed.

**Results:** 331 TAVI have been implanted in our center from June 2009 to February 2021. IE-TAVI incidence in our series is 2.7% (n=9 cases). In baseline analysis, we observed that insulin dependent diabetes mellitus, Barthel Score and Pulmonary systolic pressure >50mmHg are significantly associated with the appearance of IE-TAVI (TABLE 1).

The most frequently microorganism is Enterococcus faecalis (44.4%; n=4) followed by Staphylococcus aureus (22.2%; n=2), Coagulase-negative staphylococci (22.2%; n=2) and Streptococcus viridans (11.1%; n=1).

77.8% of IE-TAVI (n=7) are Nosocomial IE or non-nosocomial healthcare-associated IE. 2 of them have been related to implantation (1 Enterococcus

faecalis and 1 Coagulase-negative staphylococci) and 5 have been related to other interventions (2 after gastroscopy, 1 after percutaneous vascular intervention, 1 hemodialysis catheter infection and 2 unknown focus).

44.4% of IE-TAVI (n=4) were confirmed after performing Positron Emission Tomography (PET) scan. 3 cases (33.3%) were diagnosed with the initial Transthoracic Echocardiogram (TTE) and 2 cases (22.2%) were diagnosed after performing a Transesophageal Echocardiogram (TEE) (TABLE 2)

4 patients had an indication for surgery according to the ESC Guidelines (3 for persistent bacteremia and 1 for severe aortic regurgitation), but all were ruled out due to high surgical risk. Hospital mortality was 44.4% (n=4). The main predictor of hospital mortality was having an indication for surgery (p=0.028), which was present in 3 of the 4 deaths. The other death was due to digestive bleeding during hospitalization.

**Conclusions:** IE-TAVI is a serious disease with high in-hospital mortality. Insulin dependent diabetes mellitus, Barthel Score and Pulmonary systolic pressure >50mmHg are risk factors for IE-TAVI. PET-scan is the imaging test of choice when there were no echocardiographic findings. The main predictor of mortality is having an indication for surgery according to the ESC Guidelines.

TABLE 1. Baseline characteristics

|                                              | TOTAL<br>n = 331 | NO IE-TAVI<br>n = 322 | IE-TAVI<br>n = 9 | P           |
|----------------------------------------------|------------------|-----------------------|------------------|-------------|
| Age (years)                                  | 80.2 ± 7.4       | 80.2 ± 7.4            | 77.7 ± 6.2       | p = 0.307   |
| Male (n; %)                                  | 181 (54.7%)      | 174 (54.0%)           | 7 (77.8%)        | p = 0.349   |
| Body mass index                              | 27.4 ± 5.4       | 27.4 ± 5.5            | 28.1 ± 4.2       | p = 0.701   |
| Hypertension (n; %)                          | 263 (79.4%)      | 255 (79.2%)           | 8 (88.9%)        | p = 0.906   |
| Dyslipidemia (n; %)                          | 198 (59.8%)      | 192 (59.6%)           | 6 (66.7%)        | p = 0.896   |
| Diabetes mellitus (n; %)                     | 143 (43.2%)      | 138 (42.8%)           | 5 (55.6%)        | p = 0.458   |
| Diabetes mellitus insulin dependent (n; %)   | 29 (8.7%)        | 26 (8.1%)             | 3 (33.3%)        | p = 0.009** |
| Tobacco (n; %)                               | 176 (53.2%)      | 169 (52.5%)           | 7 (77.8%)        | p = 0.139   |
| Peripheral vascular disease (n; %)           | 100 (30.2%)      | 95 (29.5%)            | 5 (55.6%)        | p = 0.242   |
| Stroke (n; %)                                | 51 (15.4%)       | 49 (15.1%)            | 2 (22.2%)        | p = 0.828   |
| Cancer (n; %)                                | 17 (5.1%)        | 17 (5.3%)             | 0 (0.0%)         | p = 0.755   |
| Creatinine (mg/dl)                           | 1.3 ± 0.8        | 1.3 ± 0.8             | 1.3 ± 0.6        | p = 0.895   |
| Creatinine clearance <30 ml/min (n; %)       | 60 (18.1%)       | 58 (18.0%)            | 2 (22.2%)        | p = 0.754   |
| Barthel Score (0-100)                        | 92.4 ± 10.2      | 92.9 ± 9.2            | 75.0 ± 26.0      | p = 0.002** |
| Euro Score log                               | 23.8 ± 15.1      | 23.6 ± 14.8           | 29.6 ± 23.5      | p = 0.237   |
| Euro Score II                                | 8.9 ± 8.1        | 8.9 ± 8.1             | 10.5 ± 9.1       | p = 0.557   |
| STS Score                                    | 6.7 ± 5.4        | 6.5 ± 5.1             | 10.2 ± 9.5       | p = 0.057   |
| NYHA III-IV                                  | 260 (78.5%)      | 253 (79.1%)           | 7 (77.8%)        | p = 0.926   |
| Ejection fraction (%)                        | 55.2 ± 15.1      | 55.4 ± 15.5           | 49.1 ± 16.6      | p = 0.235   |
| Ejection fraction < 45 % (n; %)              | 78 (23.6%)       | 75 (23.3%)            | 3 (33.3%)        | p = 0.484   |
| Pulmonary systolic pressure > 50mmHg (n; %)  | 90 (27.2%)       | 84 (26.1%)            | 6 (66.7%)        | p = 0.012** |
| Previous mitral regurgitation > II/IV        | 99 (29.9%)       | 94 (29.2%)            | 5 (55.6%)        | p = 0.091   |
| Implant during Heart Failure hospitalization | 59 (17.8%)       | 57 (17.8%)            | 2 (22.2%)        | p = 0.734   |
| TAVI Type                                    |                  |                       |                  |             |
| Balloon expandable                           | 187 (56.5%)      | 183 (56.8%)           | 4 (44.4%)        | p = 0.460   |
| Self-expanding                               | 144 (43.5%)      | 139 (43.2%)           | 5 (55.6%)        |             |
| Permanent pacemaker                          | 67 (20.2%)       | 64 (19.9%)            | 3 (33.3%)        | p = 0.497   |

TABLE 2

| Case No. | TTE | TEE | PET-Scan | DIAGNOSTIC TEST |
|----------|-----|-----|----------|-----------------|
| 1        | +   | +   |          | TTE             |
| 2        | -   | -   | +        | PET-Scan        |
| 3        | -   | +   |          | TEE             |
| 4        | -   | -   | +        | PET-Scan        |
| 5        | +   | +   |          | TTE             |
| 6        | -   | -   | +        | PET-Scan        |
| 7        | -   | -   | +        | PET-Scan        |
| 8        | +   | +   |          | TTE             |
| 9        | -   | +   |          | TEE             |

TTE: Transthoracic Echocardiogram;  
TEE: Transesophageal Echocardiogram;  
PET-Scan: Positron Emission Tomography (PET) scan
